# Supplementary material for: Function of Graphene Oxide as the “Nanoquencher” for Hg2+ Detection Using an Exonuclease I-Assisted Biosensor
Source: MDPI journal article supplement (doi:10.3390/ijms23116326), 2022-06-05
Supplement: s1 [file s1]

# Function of graphene oxide (GO) as the “nanoquencher” for Hg<sup>2+</sup> detection using an exonuclease I-assisted biosensor

Ting Sun<sup>1</sup>, Xian Li<sup>1</sup>, Xiaochuan Jin<sup>1</sup>, Ziyi Wu<sup>1</sup>, Xiachao Chen<sup>2</sup>, Jieqiong Qiu<sup>1,\*</sup>

<sup>1</sup> College of Life Sciences and Medicine, Zhejiang Sci-Tech University, Hangzhou 310018, People's Republic of China

<sup>2</sup> School of Material Sciences & Engineering, Zhejiang Sci-Tech University, Hangzhou 310018, People's Republic of China

\*Corresponding author:

Jieqiong Qiu

College of Life Sciences and Medicine, Zhejiang Sci-Tech University, Hangzhou 310018, People's Republic of China

Email: [qiuqieqiongqjq@163.com](mailto:qiuqieqiongqjq@163.com); [qiuqieqiong@zstu.edu.cn](mailto:qiuqieqiong@zstu.edu.cn)

Tel: 0571-86843192

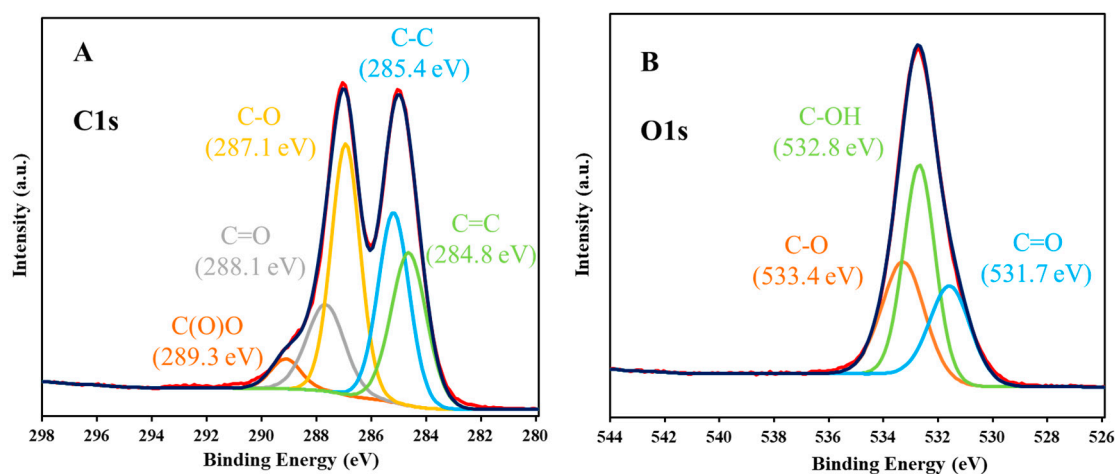

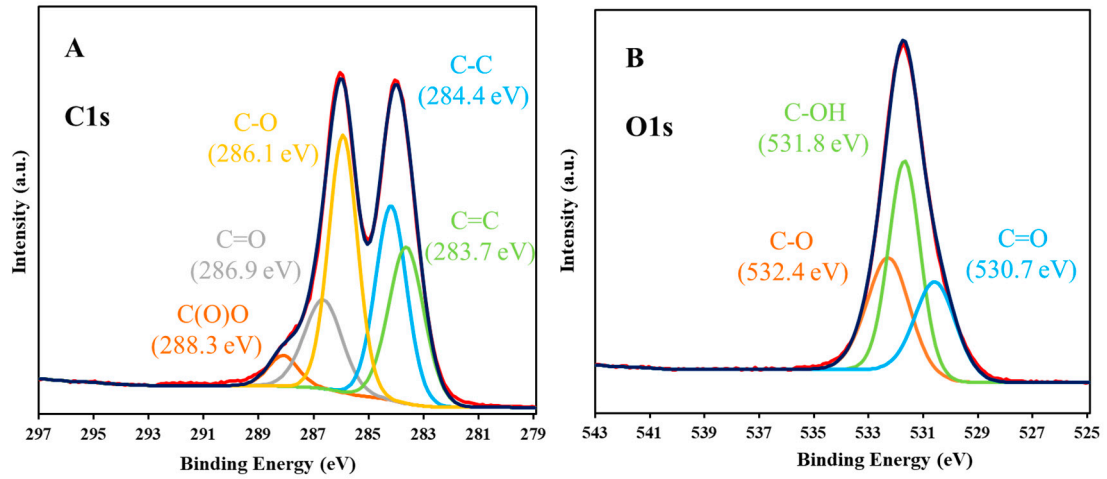

Figure S1 High-resolution XPS spectra of GO: (A) C1s spectrum, (B) O1s spectrum

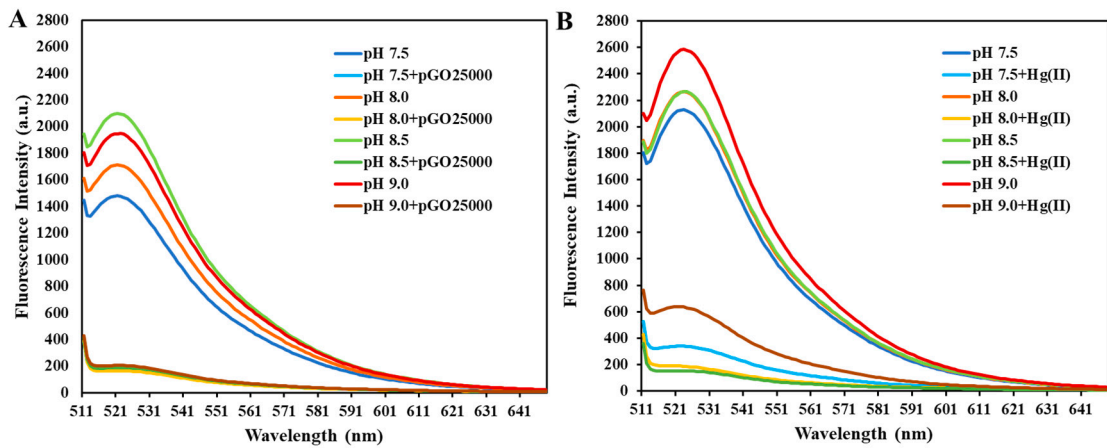

Figure S2 (A) Effect of pH values on the fluorescence intensity of FAM-ssDNA with 600 nM Hg(II) solution in the absence and presence of 0.1 µg/mL pGO25000. (B) The effect of pH values on the fluorescence intensity of FAM-ssDNA with or without 600 nM Hg(II) solution in the presence of 0.1 µg/mL pGO25000 and 2 U Exonuclease I

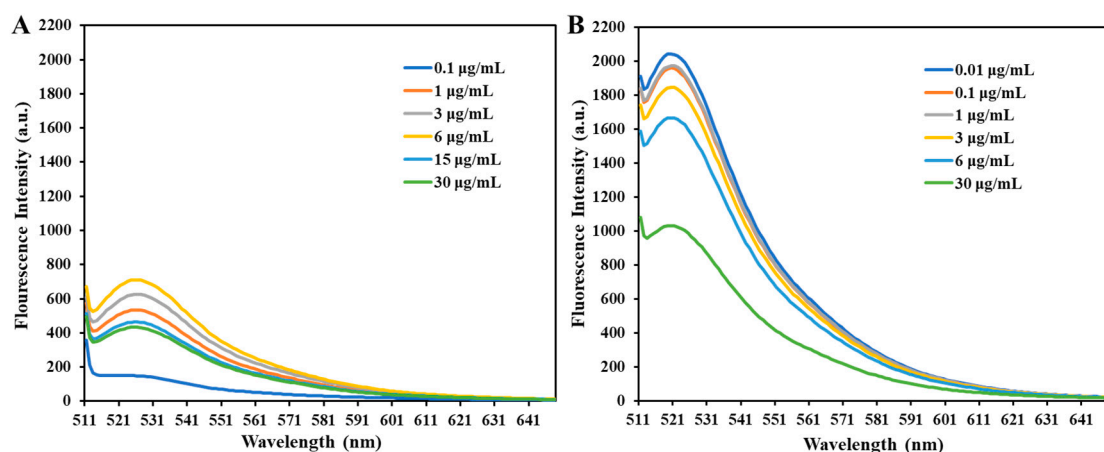

Figure S3 (A) Effects of pGO25000 concentrations from 0.1 to 30 µg/mL on fluorescence quenching of FAM-ssDNA. (B) Effects of GO concentrations from 0.01 to 30 µg/mL on fluorescence quenching of FAM-ssDNA

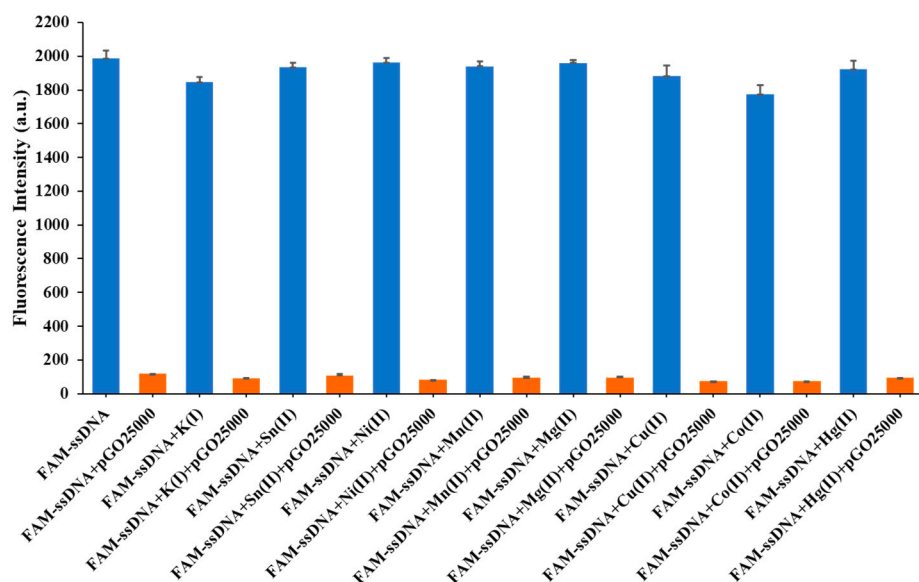

Figure S4 Selectivity of the FAM-ssDNA probes quenched by the pGO25000. The fluorescence intensities of the FAM-ssDNA probes were recorded in the absence and presence of pGO25000 (0.1 µg/mL) with the possible interference metal ions ( $K^+$ ,  $Sn^{2+}$ ,  $Ni^{2+}$ ,  $Mn^{2+}$ ,  $Mg^{2+}$ ,  $Cu^{2+}$ ,  $Co^{2+}$ ,  $Hg^{2+}$ ) respectively.  $Ex=495$  nm,  $Em=520$  nm. Each sample solution was measured three times
